# Supplementary material for: Self-Esteem and Oral Health-Related Quality of Life within a Cleft Lip and/or Palate Population: A Prospective Cohort Study
Source: MDPI journal article supplement (doi:10.3390/ijerph18116078), 2021-06-04
Supplement: s1 [file s1]

## Annex 1. Translated questions from the Sayer-Newton expectations questionnaire

47. Denk je dat het dragen van een beugel **pijnlijk** zal zijn?

Zeker niet

|   |   |   |   |   |   |   |
|---|---|---|---|---|---|---|
| 1 | 2 | 3 | 4 | 5 | 6 | 7 |
|---|---|---|---|---|---|---|

Zeker wel

48. Denk je dat je door een beugel **problemen** zal ondervinden bij **spreken**?

Zeker niet

|   |   |   |   |   |   |   |
|---|---|---|---|---|---|---|
| 1 | 2 | 3 | 4 | 5 | 6 | 7 |
|---|---|---|---|---|---|---|

Zeker wel

49. Denk je dat je door een beugel **problemen** zal ondervinden bij **eten**?

Zeker niet

|   |   |   |   |   |   |   |
|---|---|---|---|---|---|---|
| 1 | 2 | 3 | 4 | 5 | 6 | 7 |
|---|---|---|---|---|---|---|

Zeker wel

50. Denk je dat je door een beugel **minder** dingen zal kunnen **eten of drinken**?

Zeker niet

|   |   |   |   |   |   |   |
|---|---|---|---|---|---|---|
| 1 | 2 | 3 | 4 | 5 | 6 | 7 |
|---|---|---|---|---|---|---|

Zeker wel

51. Hoe denk je dat andere mensen op je beugel zullen **reageren**?

Negatieve  
reactie

|   |   |   |   |   |   |   |
|---|---|---|---|---|---|---|
| 1 | 2 | 3 | 4 | 5 | 6 | 7 |
|---|---|---|---|---|---|---|

Positieve  
reactie

52. Verwacht je dat je **door** de orthodontische **behandeling**:

a) **rechtere tanden** zal hebben?

Zeker niet

|   |   |   |   |   |   |   |
|---|---|---|---|---|---|---|
| 1 | 2 | 3 | 4 | 5 | 6 | 7 |
|---|---|---|---|---|---|---|

Zeker wel

b) een **mooiere glimlach** zal hebben?

Zeker niet

|   |   |   |   |   |   |   |
|---|---|---|---|---|---|---|
| 1 | 2 | 3 | 4 | 5 | 6 | 7 |
|---|---|---|---|---|---|---|

Zeker wel

c) beter zal kunnen **eten**?

Zeker niet

|   |   |   |   |   |   |   |
|---|---|---|---|---|---|---|
| 1 | 2 | 3 | 4 | 5 | 6 | 7 |
|---|---|---|---|---|---|---|

Zeker wel

d) beter zal kunnen **spreken**?

Zeker niet

|   |   |   |   |   |   |   |
|---|---|---|---|---|---|---|
| 1 | 2 | 3 | 4 | 5 | 6 | 7 |
|---|---|---|---|---|---|---|

Zeker wel

e) gemakkelijker je tanden zal kunnen **poetsen**?

Zeker niet

|   |   |   |   |   |   |   |
|---|---|---|---|---|---|---|
| 1 | 2 | 3 | 4 | 5 | 6 | 7 |
|---|---|---|---|---|---|---|

Zeker wel

f) meer **zelfvertrouwen** zal krijgen?

Zeker niet

|   |   |   |   |   |   |   |
|---|---|---|---|---|---|---|
| 1 | 2 | 3 | 4 | 5 | 6 | 7 |
|---|---|---|---|---|---|---|

Zeker wel
